# Supplementary material for: 1,2-Bis(imino)acenaphthene complexes of molybdenum and nickel
Source: Royal Society of Chemistry journal article supplement (doi:10.1039/b902709b), 2009-01-01
Supplement: b902709b.pdf [file b902709b.pdf]

## Supplementary Information for

### 1,2-Bis(imino)acenaphthene Complexes of Molybdenum and Nickel

Igor L. Fedushkin, Alexandra A. Skatova, Anton N. Lukoyanov, Nalalie M. Khvoinova, Alexander V. Piskunov, Alexander S. Nikipelov, Georgy K. Fukin, Konstantin A. Lysenko, Elisabeth Irran, Herbert Schumann

#### *References on DAD-, bipy- and phen-Mo(CO)<sub>4</sub> complexes.*

##### **DAD**

1. H. tom Dieck, T. Mack, K. Peters, H. G. von Schnering, *Z. Naturforsch., B: Chem. Sci.*, 1983, **38**, 568
2. M. P. Batten, A. J. Canty, K. J. Cavell, B. W. Skelton, A. H. White, *Z. Anorg. Allg. Chem.*, 2006, **632**, 876
3. R. S. Herrick, C. J. Ziegler, H. Bohan, M. Corey, M. Eskander, J. Giguere, N. McMicken, I. E. Wrona, *J. Organomet. Chem.*, 2003, **687**, 178
3. M. Doring, H. Gorls, R. Beckert, *Z. Anorg. Allg. Chem.*, 1994, **620**, 551
4. M. Doring, P. Fehling, H. Gorls, W. Imhof, R. Beckert, D. Lindauer, *J. Prakt. Chem.-Chem.-Zeitung*, 1999, **341**, 748
5. J. Wuckelt, M. Doring, H. Gorls, P. Langer, *Eur. J. Inorg. Chem.*, 2001, 805
6. P. Fehling, M. Doring, F. Knoch, R. Beckert, H. Gorls, *Chem. Ber.*, 1995, **128**, 405

##### **bipy**

1. A. V. Malkov, I. R. Baxendale, M. Bella, V. Langer, J. Fawcett, D. R. Russell, D. J. Mansfield, M. Valko, P. Kocovsky, *Organometallics*, 2001, **20**, 673
2. P. N. W. Baxter, J. A. Connor, J. D. Wallis, D. C. Povey, *J. Organomet. Chem.*, 1992, **426**, 187
3. P. N. W. Baxter, J. A. Connor, J. D. Wallis, D. C. Povey, A. K. Powell, *Polyhedron*, 1992, **11**, 1771
4. Ziu Chun Wang, Yu Xin Cui, T. C. W. Mak, H. N. C. Wong, *Chem. Commun.*, 1990, 167
5. S. S. Braga, A. C. Coelho, I. S. Goncalves, F. A. A. Paz, *Acta Crystallogr., Sect. E: Struct. Rep. Online*, 2007, **63**, m780
6. W. A. Herrmann, W. R. Thiel, J. G. Kuchler, J. Behm, E. Herdtweck, *Chem. Ber.*, 1990, **123**, 1963

##### **phen**

1. H. J. Bruins Slot, N. W. Murrall, A. J. Welch, *Acta Crystallogr., Sect. C: Cryst. Struct. Commun.*, 1985, **41**, 1309
2. Xiang-Jin Xie, Xiang-Lin Jin, Ka-Luo Tang, *Acta Crystallogr., Sect. C: Cryst. Struct. Commun.*, 2001, **57**, 696
